# Supplementary material for: A simple and generalized heat-up method for the synthesis of metal sulfide nanocrystals
Source: Royal Society of Chemistry journal article supplement (doi:10.1039/c9nj02644d), 2019-01-01
Supplement: c9nj02644d1.pdf [file c9nj02644d1.pdf]

## Simple and Generalized Heat-up Method for Metal Sulfide

### Nanocrystals

Jiayi Cui,<sup>a</sup> Lin Wang,<sup>a</sup> Xuelian Yu<sup>a\*</sup>

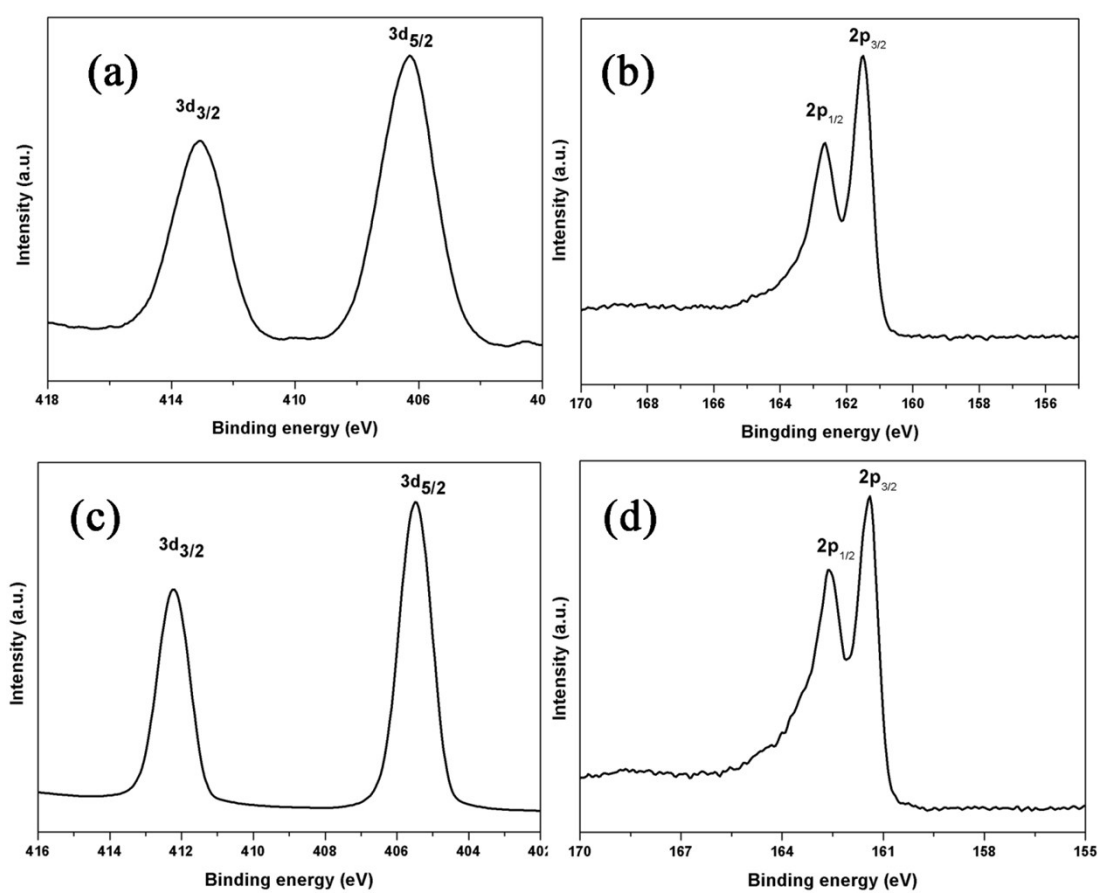

**Figure s1.** XPS spectra of Cd 3d (a,c) and S 2p (b,d) in CdS nanorods and twin-nanotower.

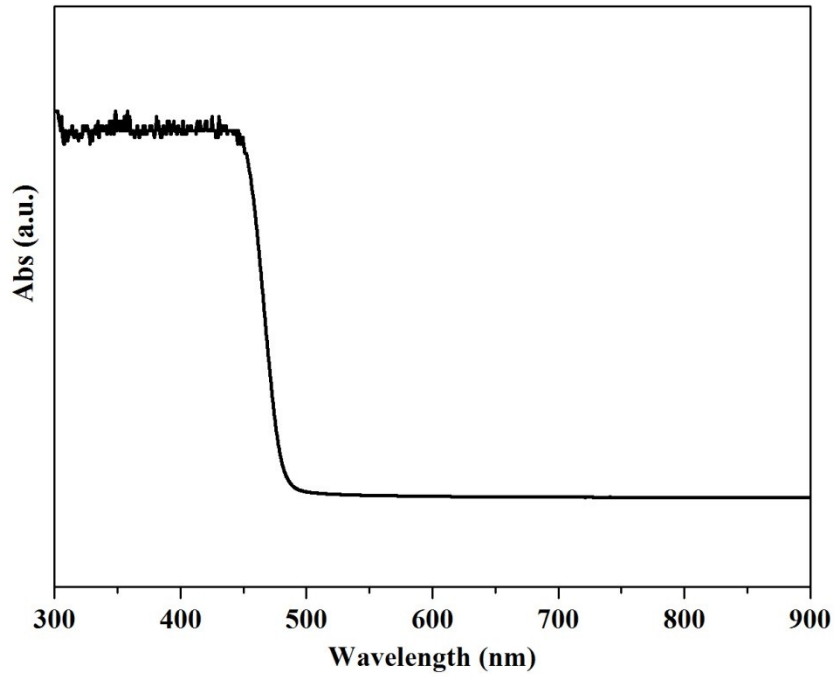

**Figure s2.** UV-Vis diffuse reflectance spectrum of CdS nanorods.

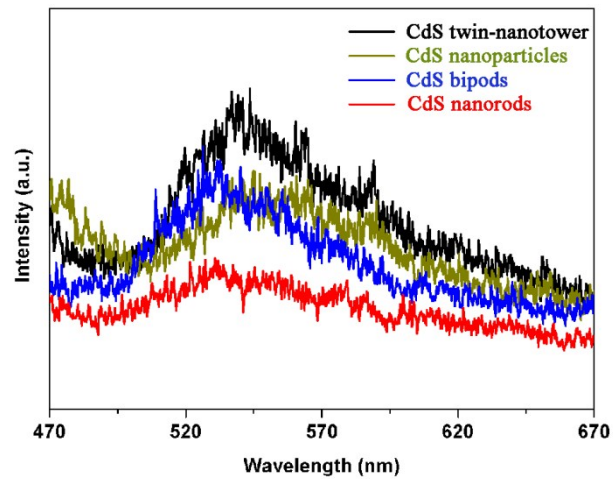

**Figure s3.** PL spectra of CdS nanorods, nanoparticles, bipods and twin-nanotower.

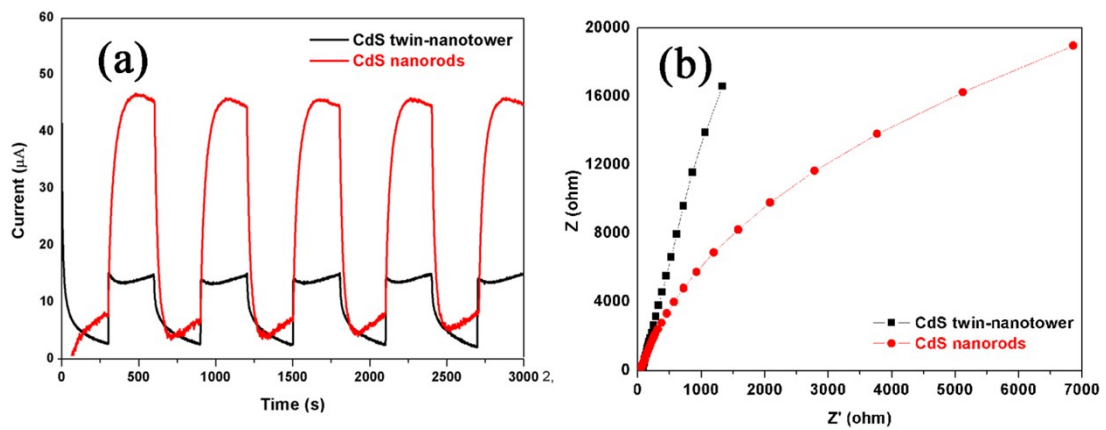

**Figure s4.** Transient photocurrent responses (a) and EIS Nyquist plots (b) of the CdS nanorods and twin-nanotower.
